# Supplementary material
Source: ML conference proceedings conference paper supplement (https://proceedings.neurips.cc/paper_files/paper/2020/hash/99ba5c4097c6b8fef5ed774a1a6714b8-Abstract.html)
Supplement: Supplementary file 2 [file 99ba5c4097c6b8fef5ed774a1a6714b8-Supplemental.zip]

Archive with 13 entries (10 files):
- supplementary_materials/
- supplementary_materials/experimental_alignment_3.mp4
- __MACOSX/
- __MACOSX/supplementary_materials/
- __MACOSX/supplementary_materials/._experimental_alignment_3.mp4
- supplementary_materials/.DS_Store
- __MACOSX/supplementary_materials/._.DS_Store
- supplementary_materials/experimental_alignment_2.mp4
- __MACOSX/supplementary_materials/._experimental_alignment_2.mp4
- supplementary_materials/experimental_alignment_1.mp4
- __MACOSX/supplementary_materials/._experimental_alignment_1.mp4
- supplementary_materials/appendix.pdf
- __MACOSX/._supplementary_materials
